# Supplementary material for: Insight into the mechanisms controlling the chemical vapor generation of cadmium
Source: Royal Society of Chemistry journal article supplement (doi:10.1039/c8ja00294k), 2018-01-01
Supplement: c8ja00294k1.pdf [file c8ja00294k1.pdf]

## Supplementary Information

### Insight into the mechanisms controlling the chemical vapor generation of cadmium

Emanuela Pitzalis, Davide Angelini, Carlo Marco Mascherpa, Alessandro D'Ulivo

C.N.R., Institute of Chemistry of Organometallic Compounds, S.S. of Pisa, Via G. Moruzzi, 1,  
56124 Pisa, Italy

#### Experimental Design

The geometry of the central composite design,  $3^2$  factorial + 4 center points, for a total of 13 points, was the same to study both  $S/S_0$  vs THB and HCl, and (Figure S1) and  $S/S_0$  vs THB and NaOH (Figure S2).

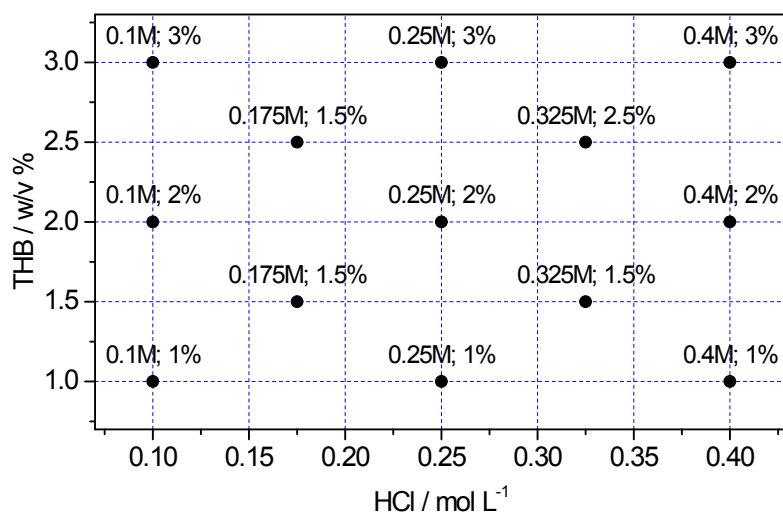

Figure S1- Experimental points selected for experimental design to study the effect of THB concentration (w/v %) in NaOH 0.1 mol L<sup>-1</sup> solution, and HCl sample acidity (mol L<sup>-1</sup>).

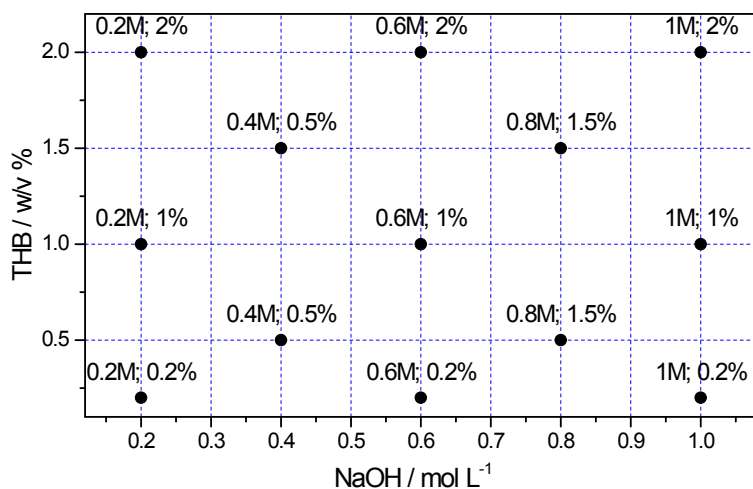

Figure S2 - Experimental points selected for experimental design to study the effect of THB concentration (w/v %) and NaOH concentration ( $\text{mol L}^{-1}$ ) in THB solution.

### Estimation of the fraction of THB hydrolyzed at different pH and reaction time

In the reaction coil  $\text{BH}_4^-$  starts to hydrolyze at a pH value that is reached after the neutralization reaction between the sample HCl and the NaOH of THB solution (reaction 6). At constant acidity the fraction of  $\text{BH}_4^-$  which is hydrolyzed at a given reaction time can be estimated by the pseudo-first order approximation of equation 8:

$$\alpha = 1 - \exp(-k_1 [H^+] t) \quad (\text{E1})$$

In this case, the pH increase during hydrolysis due to reaction of  $\text{BH}_4^-$  with  $\text{H}_3\text{O}^+$  or  $\text{H}_2\text{O}$  and the first order approximation cannot be applied.

However, considering the limited reaction times involved in the continuous flow CVG system ( $< 0.5$  s for a  $50 \mu\text{L}$  loop) the use of equation E1 could be useful for the estimation of approximated  $\alpha$ . This can be verified with the aid of Table S1, where the value of  $\alpha$  (equation E1) are reported at different acidity. Assuming that the acidity reported in Table S1 are those achieved after pH equilibration, the acidity will decrease during hydrolysis due to reaction 7, slowing the rate of hydrolysis of  $\text{BH}_4^-$ , and the corresponding value of  $\alpha$  reported in Table S1 will be overestimated. This allows, at least, to conclude that when the hydrolysis of  $\text{BH}_4^-$  starts at  $\text{pH} > 7$ , after the neutralization step, the fraction of hydrolyzed  $\text{BH}_4^-$  is negligible for the reaction times involved in a CVG apparatus.

Table S1- Fraction of  $\text{BH}_4^-$  hydrolyzed at different acidities and reaction times.

| Time/s | Hydrolyzed Fraction, $\alpha$ (%) <sup>a</sup> |      |      |      |       |       |                       |                      |
|--------|------------------------------------------------|------|------|------|-------|-------|-----------------------|----------------------|
|        | pH=4                                           | pH=5 | pH=6 | pH=7 | pH=8  | pH=9  | pH=10                 | pH=11                |
| 0.02   | 86                                             | 18   | 2.0  | 0.20 | 0.020 | 0.002 | $2.0 \times 10^{-4}$  | $2.0 \times 10^{-5}$ |
| 0.05   | 99                                             | 39   | 4.9  | 0.50 | 0.050 | 0.005 | $52.0 \times 10^{-4}$ | $5.0 \times 10^{-5}$ |
| 0.1    | 100                                            | 63   | 9.5  | 1.00 | 0.10  | 0.010 | $1.0 \times 10^{-3}$  | $1.0 \times 10^{-4}$ |
| 0.2    | 100                                            | 86   | 18   | 2.0  | 0.20  | 0.020 | 0.0020                | $2.0 \times 10^{-4}$ |
| 0.5    | 100                                            | 99   | 39   | 4.9  | 0.50  | 0.050 | 0.0050                | $5.0 \times 10^{-4}$ |

a-Calculated from equation E1,  $k_1=10^{-6} \text{ L}^{-1} \text{ mol}^{-1} \text{ s}^{-1}$ .

### MDF atomizer: fitting of the linear portion of calibration graphs

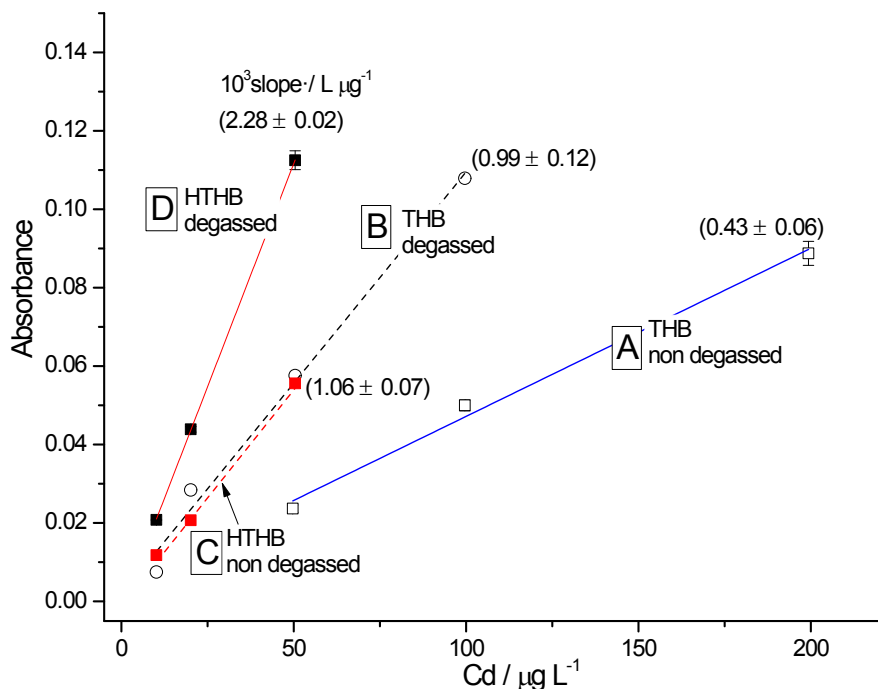

Figure S3 – Slope of the linear portions of calibration graphs reported in Figure 8a, obtained by CVG of cadmium using miniature diffusion flame atomizer and different reaction conditions.
